# Supplementary material
Source: PubMed Central journal article supplement (PMC10992313)
Supplement: 262_2021_2885_MOESM2_ESM.pdf [file 262_2021_2885_MOESM2_ESM.pdf]

# Supplementary Figure S2

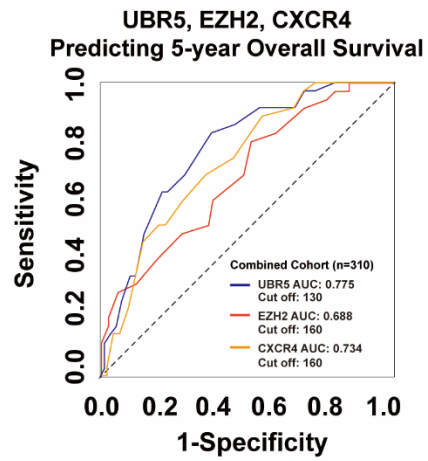

Supplementary Fig. S2 A time-dependent ROC analysis was for the optimum cut-off value of UBR5, EZH2, and CXCR4
