# Supplementary material
Source: PubMed Central journal article supplement (PMC10992313)
Supplement: 262_2021_2885_MOESM3_ESM.pdf [file 262_2021_2885_MOESM3_ESM.pdf]

## Supplementary Tables S1-S19

**Table S1 Characteristics of patients with clear cell renal cell carcinoma**

| Characteristic   | Total (n=310) | 3:2 ratio                  |                              | 1:1 ratio                  |                              |
|------------------|---------------|----------------------------|------------------------------|----------------------------|------------------------------|
|                  |               | training cohort<br>(n=186) | validation cohort<br>(n=124) | training cohort<br>(n=155) | validation cohort<br>(n=155) |
| <b>Age</b>       |               |                            |                              |                            |                              |
| <60              | 185 (59.7%)   | 116 (62.4%)                | 69 (55.6%)                   | 89 (57.4%)                 | 96 (61.9%)                   |
| ≥60              | 125 (40.3%)   | 70 (37.6%)                 | 55 (44.4%)                   | 66 (42.6%)                 | 59 (38.1%)                   |
| <b>Gender</b>    |               |                            |                              |                            |                              |
| Male             | 223 (71.9%)   | 131 (70.4%)                | 92 (74.2%)                   | 106 (68.4%)                | 117 (75.5%)                  |
| Female           | 87 (28.1%)    | 55 (29.6%)                 | 32 (25.8%)                   | 49 (31.6%)                 | 38 (24.5%)                   |
| <b>WHO/ISUP</b>  |               |                            |                              |                            |                              |
| <b>Grading</b>   |               |                            |                              |                            |                              |
| I-II             | 244 (78.7%)   | 143 (76.9%)                | 101 (81.5%)                  | 122 (78.7%)                | 122 (78.7%)                  |
| III-IV           | 66 (21.3%)    | 43 (23.1%)                 | 23 (18.5%)                   | 33 (21.3%)                 | 33 (21.3%)                   |
| <b>TNM stage</b> |               |                            |                              |                            |                              |
| I-II             | 270 (87.1%)   | 159 (85.5%)                | 111 (89.5%)                  | 138 (89.0%)                | 132 (85.2%)                  |
| III              | 40 (12.9%)    | 27 (14.5%)                 | 13 (10.5%)                   | 17 (11.0%)                 | 23 (14.8%)                   |
| <b>SSIGN</b>     |               |                            |                              |                            |                              |
| 0-4              | 286 (92.3%)   | 171 (91.9%)                | 115 (92.7%)                  | 144 (92.9%)                | 142 (91.6%)                  |
| ≥5               | 24 (7.7%)     | 15 (8.1%)                  | 9 (7.3%)                     | 11 (7.1%)                  | 13 (8.4%)                    |

**Table S2 The correlation between UBR5 expression and clinicopathologic characteristics of patients with clear cell renal cell carcinoma in the validation cohort (n=124) (3:2 ratio)**

| Characteristic              | UBR5*                    |                           | Sum<br>(124) | P**<br>value  |
|-----------------------------|--------------------------|---------------------------|--------------|---------------|
|                             | Low expression<br>(n=47) | High expression<br>(n=77) |              |               |
| <b>Age</b>                  |                          |                           |              | 0.491         |
| <60                         | 28                       | 41                        | 69           |               |
| ≥60                         | 19                       | 36                        | 55           |               |
| <b>Gender</b>               |                          |                           |              | 0.633         |
| Male                        | 36                       | 56                        | 92           |               |
| Female                      | 11                       | 21                        | 32           |               |
| <b>WHO/ISUP<br/>Grading</b> |                          |                           |              | <b>0.012</b>  |
| I-II                        | 33                       | 68                        | 101          |               |
| III-IV                      | 14                       | 9                         | 23           |               |
| <b>TNM stage</b>            |                          |                           |              | <b>0.002*</b> |
| I-II                        | 37                       | 74                        | 111          |               |
| III                         | 10                       | 3                         | 13           |               |
| <b>SSIGN</b>                |                          |                           |              | <b>0.011*</b> |
| 0-4                         | 40                       | 75                        | 115          |               |
| ≥5                          | 7                        | 2                         | 9            |               |

\*: UBR5<sup>low</sup> expression: H-scores of UBR5 < 130 ; UBR5<sup>high</sup> expression: H-scores of UBR5 ≥ 130.

\*\* : Statistical significance was calculated by chi-square test or fisher's exact test for categorical/binary measures

**Table S3 The correlation between UBR5 expression and clinicopathologic characteristics of patients with clear cell renal cell carcinoma in the training cohort (n=155) (1:1 ratio)**

| Characteristic              | UBR5*                    |                            | Sum<br>(155) | P**<br>value  |
|-----------------------------|--------------------------|----------------------------|--------------|---------------|
|                             | Low expression<br>(n=40) | High expression<br>(n=115) |              |               |
| <b>Age</b>                  |                          |                            |              | 0.715         |
| <60                         | 22                       | 67                         | 89           |               |
| ≥60                         | 18                       | 48                         | 66           |               |
| <b>Gender</b>               |                          |                            |              | 0.593         |
| Male                        | 26                       | 80                         | 106          |               |
| Female                      | 14                       | 35                         | 49           |               |
| <b>WHO/ISUP<br/>Grading</b> |                          |                            |              | <b>0.044</b>  |
| I-II                        | 27                       | 95                         | 122          |               |
| III-IV                      | 13                       | 20                         | 33           |               |
| <b>TNM stage</b>            |                          |                            |              | <b>0.044*</b> |
| I-II                        | 32                       | 106                        | 138          |               |
| III                         | 8                        | 9                          | 17           |               |
| <b>SSIGN</b>                |                          |                            |              | <b>0.035*</b> |
| 0-4                         | 34                       | 110                        | 144          |               |
| ≥5                          | 6                        | 5                          | 11           |               |

\*: UBR5<sup>low</sup> expression: H-scores of UBR5 < 100 ; UBR5<sup>high</sup> expression: H-scores of UBR5 ≥ 100.

\*\* : Statistical significance was calculated by chi-square test or fisher's exact test for categorical/binary measures

**Table S4 The correlation between UBR5 expression and clinicopathologic characteristics of patients with clear cell renal cell carcinoma in the validation cohort (n=155) (1:1 ratio)**

| Characteristic              | UBR5*                    |                            | Sum<br>(155) | P**<br>value  |
|-----------------------------|--------------------------|----------------------------|--------------|---------------|
|                             | Low expression<br>(n=40) | High expression<br>(n=115) |              |               |
| <b>Age</b>                  |                          |                            |              | 0.502         |
| <60                         | 23                       | 73                         | 96           |               |
| ≥60                         | 17                       | 42                         | 59           |               |
| <b>Gender</b>               |                          |                            |              | 0.441         |
| Male                        | 32                       | 85                         | 117          |               |
| Female                      | 8                        | 30                         | 38           |               |
| <b>WHO/ISUP<br/>Grading</b> |                          |                            |              | <b>0.044</b>  |
| I-II                        | 27                       | 95                         | 122          |               |
| III-IV                      | 13                       | 20                         | 33           |               |
| <b>TNM stage</b>            |                          |                            |              | <b>0.002</b>  |
| I-II                        | 28                       | 104                        | 132          |               |
| III                         | 12                       | 11                         | 23           |               |
| <b>SSIGN</b>                |                          |                            |              | <b>0.024*</b> |
| 0-4                         | 33                       | 109                        | 142          |               |
| ≥5                          | 7                        | 6                          | 13           |               |

\*: UBR5<sup>low</sup> expression: H-scores of UBR5 < 100; UBR5<sup>high</sup> expression: H-scores of UBR5 ≥ 100.

\*\* : Statistical significance was calculated by chi-square test or fisher's exact test for categorical/binary measures

**Table S5 The correlation between UBR5 expression and clinicopathologic characteristics of patients with clear cell renal cell carcinoma in the combined cohort (n=310)**

| Characteristic              | UBR5*                     |                            | Sum<br>(310) | P**<br>value |
|-----------------------------|---------------------------|----------------------------|--------------|--------------|
|                             | Low expression<br>(n=133) | High expression<br>(n=177) |              |              |
| <b>Age</b>                  |                           |                            |              | 0.883        |
| <60                         | 80                        | 105                        | 185          |              |
| ≥60                         | 53                        | 72                         | 125          |              |
| <b>Gender</b>               |                           |                            |              | 0.735        |
| Male                        | 97                        | 126                        | 223          |              |
| Female                      | 36                        | 51                         | 87           |              |
| <b>WHO/ISUP<br/>Grading</b> |                           |                            |              | <0.001       |
| I-II                        | 92                        | 152                        | 244          |              |
| III-IV                      | 41                        | 25                         | 66           |              |
| <b>TNM stage</b>            |                           |                            |              | <0.001       |
| I-II                        | 105                       | 165                        | 270          |              |
| III                         | 28                        | 12                         | 40           |              |
| <b>SSIGN</b>                |                           |                            |              | 0.001        |
| 0-4                         | 115                       | 171                        | 286          |              |
| ≥5                          | 18                        | 6                          | 24           |              |

\*: UBR5<sup>low</sup> expression: H-scores of UBR5 < 130 ; UBR5<sup>high</sup> expression: H-scores of UBR5 ≥ 130.

\*\* : Statistical significance was calculated by chi-square test or fisher's exact test for categorical/binary measures

**Table S6 The correlation between expressions of UBR5, CD163 and clinicopathologic characteristics of patients with clear cell renal cell carcinoma in the validation cohort (n=124) (3:2 ratio)**

| Characteristic   | UBR5/CD163 expression*                                 |                                                         |                                                       |                                                        | Sum<br>(124) | P**<br>value  |
|------------------|--------------------------------------------------------|---------------------------------------------------------|-------------------------------------------------------|--------------------------------------------------------|--------------|---------------|
|                  | UBR5 <sup>high</sup><br>CD163 <sup>low</sup><br>(n=55) | UBR5 <sup>high</sup><br>CD163 <sup>high</sup><br>(n=22) | UBR5 <sup>low</sup><br>CD163 <sup>low</sup><br>(n=10) | UBR5 <sup>low</sup><br>CD163 <sup>high</sup><br>(n=37) |              |               |
| <b>Age</b>       |                                                        |                                                         |                                                       |                                                        |              | 0.788         |
| <60              | 29                                                     | 12                                                      | 7                                                     | 21                                                     | 69           |               |
| ≥60              | 26                                                     | 10                                                      | 3                                                     | 16                                                     | 55           |               |
| <b>Gender</b>    |                                                        |                                                         |                                                       |                                                        |              | 0.320         |
| Male             | 37                                                     | 19                                                      | 7                                                     | 29                                                     | 92           |               |
| Female           | 18                                                     | 3                                                       | 3                                                     | 8                                                      | 32           |               |
| <b>WHO/ISU</b>   |                                                        |                                                         |                                                       |                                                        |              | <b>0.001*</b> |
| <b>P Grading</b> |                                                        |                                                         |                                                       |                                                        |              |               |
| I-II             | 48                                                     | 20                                                      | 3                                                     | 30                                                     | 101          |               |
| III-IV           | 7                                                      | 2                                                       | 7                                                     | 7                                                      | 23           |               |
| <b>TNM stage</b> |                                                        |                                                         |                                                       |                                                        |              | <b>0.020*</b> |
| I-II             | 53                                                     | 21                                                      | 7                                                     | 30                                                     | 111          |               |
| III              | 2                                                      | 1                                                       | 3                                                     | 7                                                      | 13           |               |
| <b>SSIGN</b>     |                                                        |                                                         |                                                       |                                                        |              | <b>0.008*</b> |
| 0-4              | 55                                                     | 20                                                      | 8                                                     | 32                                                     | 115          |               |
| ≥5               | 0                                                      | 2                                                       | 2                                                     | 5                                                      | 9            |               |

\*: UBR5<sup>low</sup> expression: H-scores of UBR5 < 130; UBR5<sup>high</sup> expression: H-scores of UBR5 ≥ 130; CD163<sup>low</sup> expression: Density of CD163 < 15 cells/mm<sup>2</sup>; CD163<sup>high</sup> expression: Density of CD163 ≥ 15 cells/mm<sup>2</sup>.

\*\* : Statistical significance was calculated by chi-square test or fisher's exact test for categorical/binary measures and ANOVA for continuous measures

**Table S7 The correlation between expressions of UBR5, CD163 and clinicopathologic characteristics of patients with clear cell renal cell carcinoma in the training cohort (n=155) (1:1 ratio)**

| Characteristic               | UBR5/CD163 expression*                                 |                                                         |                                                       |                                                        | Sum<br>(155) | P**<br>value |
|------------------------------|--------------------------------------------------------|---------------------------------------------------------|-------------------------------------------------------|--------------------------------------------------------|--------------|--------------|
|                              | UBR5 <sup>high</sup><br>CD163 <sup>low</sup><br>(n=73) | UBR5 <sup>high</sup><br>CD163 <sup>high</sup><br>(n=42) | UBR5 <sup>low</sup><br>CD163 <sup>low</sup><br>(n=10) | UBR5 <sup>low</sup><br>CD163 <sup>high</sup><br>(n=30) |              |              |
| <b>Age</b>                   |                                                        |                                                         |                                                       |                                                        |              | 0.640        |
| <60                          | 44                                                     | 23                                                      | 7                                                     | 15                                                     | 89           |              |
| ≥60                          | 29                                                     | 19                                                      | 3                                                     | 15                                                     | 66           |              |
| <b>Gender</b>                |                                                        |                                                         |                                                       |                                                        |              | 0.389        |
| Male                         | 48                                                     | 32                                                      | 5                                                     | 21                                                     | 106          |              |
| Female                       | 25                                                     | 10                                                      | 5                                                     | 9                                                      | 49           |              |
| <b>WHO/ISU<br/>P Grading</b> |                                                        |                                                         |                                                       |                                                        |              | <0.001       |
| I-II                         | 61                                                     | 34                                                      | 2                                                     | 25                                                     | 122          |              |
| III-IV                       | 12                                                     | 8                                                       | 8                                                     | 5                                                      | 33           |              |
| <b>TNM stage</b>             |                                                        |                                                         |                                                       |                                                        |              | 0.035*       |
| I-II                         | 70                                                     | 36                                                      | 9                                                     | 23                                                     | 138          |              |
| III                          | 3                                                      | 6                                                       | 1                                                     | 7                                                      | 17           |              |
| <b>SSIGN</b>                 |                                                        |                                                         |                                                       |                                                        |              | 0.031*       |
| 0-4                          | 72                                                     | 38                                                      | 9                                                     | 25                                                     | 144          |              |
| ≥5                           | 1                                                      | 4                                                       | 1                                                     | 5                                                      | 11           |              |

\*: UBR5<sup>low</sup> expression: H-scores of UBR5<100; UBR5<sup>high</sup> expression: H-scores of UBR5≥100; CD163<sup>low</sup> expression: Density of CD163<15 cells/mm<sup>2</sup>; CD163<sup>high</sup> expression: Density of CD163≥15 cells/mm<sup>2</sup>;

\*\* : Statistical significance was calculated by chi-square test or fisher's exact test for categorical/binary measures and ANOVA for continuous measures

**Table S8 The correlation between expressions of UBR5, CD163 and clinicopathologic characteristics of patients with clear cell renal cell carcinoma in the validation cohort (n=155) (1:1 ratio)**

| Characteristic   | UBR5/CD163 expression*                                 |                                                         |                                                       |                                                        | Sum<br>(155) | P**<br>value  |
|------------------|--------------------------------------------------------|---------------------------------------------------------|-------------------------------------------------------|--------------------------------------------------------|--------------|---------------|
|                  | UBR5 <sup>high</sup><br>CD163 <sup>low</sup><br>(n=70) | UBR5 <sup>high</sup><br>CD163 <sup>high</sup><br>(n=45) | UBR5 <sup>low</sup><br>CD163 <sup>low</sup><br>(n=17) | UBR5 <sup>low</sup><br>CD163 <sup>high</sup><br>(n=23) |              |               |
| <b>Age</b>       |                                                        |                                                         |                                                       |                                                        |              | 0.449         |
| <60              | 45                                                     | 28                                                      | 12                                                    | 11                                                     | 96           |               |
| ≥60              | 25                                                     | 17                                                      | 5                                                     | 12                                                     | 59           |               |
| <b>Gender</b>    |                                                        |                                                         |                                                       |                                                        |              | 0.063         |
| Male             | 46                                                     | 39                                                      | 13                                                    | 19                                                     | 117          |               |
| Female           | 24                                                     | 6                                                       | 4                                                     | 4                                                      | 38           |               |
| <b>WHO/ISU</b>   |                                                        |                                                         |                                                       |                                                        |              | <b>0.010*</b> |
| <b>P Grading</b> |                                                        |                                                         |                                                       |                                                        |              |               |
| I-II             | 60                                                     | 35                                                      | 15                                                    | 12                                                     | 122          |               |
| III-IV           | 10                                                     | 10                                                      | 2                                                     | 11                                                     | 33           |               |
| <b>TNM stage</b> |                                                        |                                                         |                                                       |                                                        |              | <b>0.001*</b> |
| I-II             | 67                                                     | 37                                                      | 10                                                    | 18                                                     | 132          |               |
| III              | 3                                                      | 8                                                       | 7                                                     | 5                                                      | 23           |               |
| <b>SSIGN</b>     |                                                        |                                                         |                                                       |                                                        |              | <b>0.017*</b> |
| 0-4              | 68                                                     | 41                                                      | 16                                                    | 17                                                     | 142          |               |
| ≥5               | 2                                                      | 4                                                       | 1                                                     | 6                                                      | 13           |               |

\*: UBR5<sup>low</sup> expression: H-scores of UBR5<100; UBR5<sup>high</sup> expression: H-scores of UBR5≥100; CD163<sup>low</sup> expression: Density of CD163<15 cells/mm<sup>2</sup>; CD163<sup>high</sup> expression: Density of CD163≥15 cells/mm<sup>2</sup>.

\*\* : Statistical significance was calculated by chi-square test or fisher's exact test for categorical/binary measures and ANOVA for continuous measures



**Table S9 The correlation between expressions of UBR5, CD163 and clinicopathologic characteristics of patients with clear cell renal cell carcinoma in the combined cohort (n=310)**

| Characteristic               | UBR5/CD163 expression*                                  |                                                         |                                                       |                                                        | Sum<br>(310) | P**<br>value     |
|------------------------------|---------------------------------------------------------|---------------------------------------------------------|-------------------------------------------------------|--------------------------------------------------------|--------------|------------------|
|                              | UBR5 <sup>high</sup><br>CD163 <sup>low</sup><br>(n=120) | UBR5 <sup>high</sup><br>CD163 <sup>high</sup><br>(n=57) | UBR5 <sup>low</sup><br>CD163 <sup>low</sup><br>(n=50) | UBR5 <sup>low</sup><br>CD163 <sup>high</sup><br>(n=83) |              |                  |
| <b>Age</b>                   |                                                         |                                                         |                                                       |                                                        |              | 0.307            |
| <60                          | 73                                                      | 32                                                      | 35                                                    | 45                                                     | 185          |                  |
| ≥60                          | 47                                                      | 25                                                      | 15                                                    | 38                                                     | 125          |                  |
| <b>Gender</b>                |                                                         |                                                         |                                                       |                                                        |              | <b>0.043</b>     |
| Male                         | 78                                                      | 48                                                      | 34                                                    | 63                                                     | 223          |                  |
| Female                       | 42                                                      | 9                                                       | 16                                                    | 20                                                     | 87           |                  |
| <b>WHO/ISU<br/>P Grading</b> |                                                         |                                                         |                                                       |                                                        |              | <b>0.002</b>     |
| I-II                         | 106                                                     | 46                                                      | 32                                                    | 60                                                     | 244          |                  |
| III-IV                       | 14                                                      | 11                                                      | 18                                                    | 23                                                     | 66           |                  |
| <b>TNM stage</b>             |                                                         |                                                         |                                                       |                                                        |              | <b>&lt;0.001</b> |
| I-II                         | 117                                                     | 48                                                      | 39                                                    | 66                                                     | 270          |                  |
| III                          | 3                                                       | 9                                                       | 11                                                    | 17                                                     | 40           |                  |
| <b>SSIGN</b>                 |                                                         |                                                         |                                                       |                                                        |              | <b>&lt;0.001</b> |
| 0-4                          | 118                                                     | 53                                                      | 47                                                    | 68                                                     | 286          |                  |
| ≥5                           | 2                                                       | 4                                                       | 3                                                     | 15                                                     | 24           |                  |

\*: UBR5<sup>low</sup> expression: H-scores of UBR5<130; UBR5<sup>high</sup> expression: H-scores of UBR5≥130; CD163<sup>low</sup> expression: Density of CD163<15 cells/mm<sup>2</sup>; CD163<sup>high</sup> expression: Density of CD163≥15 cells/mm<sup>2</sup>.

\*\* : Statistical significance was calculated by chi-square test or fisher's exact test for categorical/binary measures and ANOVA for continuous measur

**Table S10 Univariate and multivariate cox regression analysis of UBR5, CD163 and clinicopathologic characteristics with overall survival and progression-free survival in the training cohort (n=186) (3:2 ratio)**

| Characteristics                 | Overall survival        |                  |                        |              | Progression free survival |                  |                         |                  |
|---------------------------------|-------------------------|------------------|------------------------|--------------|---------------------------|------------------|-------------------------|------------------|
|                                 | Univariate              |                  | Multivariate           |              | Univariate                |                  | Multivariate            |                  |
|                                 | HR (95% CI)             | P Value          | HR (95% CI)            | P Value      | HR (95% CI)               | P Value          | HR (95% CI)             | P Value          |
| Age (<60y vs ≥60y)              | 1.844<br>(0.748-4.541)  | 0.184            | 1.316<br>(0.487-3.552) | 0.588        | 1.38 (0.715-2.663)        | 0.337            | 0.895<br>(0.431-1.859)  | 0.766            |
| Gender (Male vs Female)         | 1.165<br>(0.443-3.068)  | 0.757            | 1.484<br>(0.52-4.236)  | 0.461        | 0.809 (0.38-1.72)         | 0.581            | 0.692<br>(0.308-1.556)  | 0.374            |
| WHO/ISUP Grading (1-2 vs 3-4)   | 2.783<br>(1.115-6.947)  | <b>0.028</b>     | 2.473<br>(0.869-7.042) | 0.09         | 2.348 (1.2-4.597)         | <b>0.013</b>     | 1.852<br>(0.887-3.866)  | 0.101            |
| TNM stage (1-2 vs 3)            | 6.923<br>(2.773-17.287) | <b>&lt;0.001</b> | 2.808<br>(1.014-7.779) | <b>0.047</b> | 5.556<br>(2.855-10.811)   | <b>&lt;0.001</b> | 2.348<br>(1.162-4.744)  | <b>0.017</b>     |
| SSIGN (1-4 vs ≥5)               | 9.308<br>(3.726-23.251) | <b>&lt;0.001</b> | 3.277<br>(1.07-10.035) | <b>0.038</b> | 16.027<br>(7.444-34.507)  | <b>&lt;0.001</b> | 9.749<br>(3.673-25.871) | <b>&lt;0.001</b> |
| UBR5 expression (Low vs High)*  | 0.108<br>(0.031-0.374)  | <b>&lt;0.001</b> | 0.192<br>(0.052-0.703) | <b>0.013</b> | 0.14 (0.061-0.323)        | <b>&lt;0.001</b> | 0.198<br>(0.083-0.473)  | <b>&lt;0.001</b> |
| CD163 expression (Low vs High)* | 8.689<br>(2.516-30.013) | <b>0.001</b>     | 4.43<br>(1.171-16.763) | <b>0.028</b> | 4.956<br>(2.324-10.572)   | <b>&lt;0.001</b> | 3.031<br>(1.348-6.816)  | <b>0.007</b>     |

\*: UBR5<sup>low</sup> expression: H-scores of UBR5<130; UBR5<sup>high</sup> expression: H-scores of UBR5≥130; CD163<sup>low</sup> expression: Density of CD163<15 cells/mm<sup>2</sup>; CD163<sup>high</sup> expression: Density of CD163≥15 cells/mm<sup>2</sup>;

**Table S11 Univariate and multivariate cox regression analysis of UBR5, CD163 and clinicopathologic characteristics with overall survival and progression-free survival in the validation cohort (n= 124) (3:2 ratio)**

| Characteristics                 | Overall survival      |                  |                      |              | Progression free survival |                  |                     |                  |
|---------------------------------|-----------------------|------------------|----------------------|--------------|---------------------------|------------------|---------------------|------------------|
|                                 | Univariate            |                  | Multivariate         |              | Univariate                |                  | Multivariate        |                  |
|                                 | HR (95% CI)           | P Value          | HR (95% CI)          | P Value      | HR (95% CI)               | P Value          | HR (95% CI)         | P Value          |
| Age (<60y vs ≥60y)              | 0.844 (0.306-2.328)   | 0.743            | 0.984 (0.309-3.133)  | 0.978        | 0.959 (0.473-1.944)       | 0.908            | 1.169 (0.555-2.462) | 0.682            |
| Gender (Male vs Female)         | 0.646 (0.184-2.269)   | 0.496            | 1.077 (0.249-4.658)  | 0.92         | 0.657 (0.27-1.595)        | 0.353            | 0.911 (0.346-2.397) | 0.85             |
| WHO/ISUP Grading (1-2 vs 3-4)   | 2.882 (1.045-7.945)   | <b>0.041</b>     | 2.01 (0.548-7.366)   | 0.292        | 2.754 (1.325-5.726)       | <b>0.007</b>     | 1.515 (0.618-3.715) | 0.364            |
| TNM stage (1-2 vs 3)            | 9.018 (3.324-24.468)  | <b>&lt;0.001</b> | 3.448 (1.061-11.203) | <b>0.04</b>  | 7.442 (3.446-16.072)      | <b>&lt;0.001</b> | 3.278 (1.324-8.116) | <b>0.01</b>      |
| SSIGN (1-4 vs ≥5)               | 16.012 (5.573-46.005) | <b>&lt;0.001</b> | 9.122 (2.314-35.962) | <b>0.002</b> | 14.949 (5.764-38.769)     | <b>&lt;0.001</b> | 7.44 (2.489-22.241) | <b>&lt;0.001</b> |
| UBR5 expression (Low vs High)*  | 0.116 (0.033-0.409)   | <b>0.001</b>     | 0.215 (0.053-0.878)  | <b>0.032</b> | 0.149 (0.067-0.333)       | <b>&lt;0.001</b> | 0.331 (0.134-0.813) | <b>0.016</b>     |
| CD163 expression (Low vs High)* | 5.746 (1.633-20.215)  | <b>0.006</b>     | 5.232 (1.26-21.724)  | <b>0.023</b> | 2.999 (1.418-6.34)        | <b>0.004</b>     | 2.531 (1.049-6.107) | <b>0.039</b>     |

\*: UBR5<sup>low</sup> expression: H-scores of UBR5<130; UBR5<sup>high</sup> expression: H-scores of UBR5≥130; CD163<sup>low</sup> expression: Density of CD163<15 cells/mm<sup>2</sup>; CD163<sup>high</sup> expression: Density of CD163≥15 cells/mm<sup>2</sup>.

**Table S12 Univariate and multivariate cox regression analysis of UBR5, CD163 and clinicopathologic characteristics with overall survival and progression-free survival in the training cohort (n=155) (1:1 ratio)**

| Characteristics                 | Overall survival      |                  |                      |              | Progression free survival |                  |                      |                  |
|---------------------------------|-----------------------|------------------|----------------------|--------------|---------------------------|------------------|----------------------|------------------|
|                                 | Univariate            |                  | Multivariate         |              | Univariate                |                  | Multivariate         |                  |
|                                 | HR (95% CI)           | P Value          | HR (95% CI)          | P Value      | HR (95% CI)               | P Value          | HR (95% CI)          | P Value          |
| Age (<60y vs ≥60y)              | 1.355 (0.55-3.338)    | 0.509            | 1.081 (0.392-2.984)  | 0.881        | 1.099 (0.562-2.147)       | 0.783            | 0.924 (0.451-1.895)  | 0.829            |
| Gender (Male vs Female)         | 1.452 (0.57-3.699)    | 0.434            | 0.767 (0.234-2.516)  | 0.662        | 1.151 (0.563-2.353)       | 0.701            | 0.754 (0.331-1.719)  | 0.502            |
| WHO/ISUP Grading (1-2 vs 3-4)   | 3.172 (1.266-7.946)   | <b>0.014</b>     | 1.74 (0.605-5.006)   | 0.304        | 2.248 (1.115-4.533)       | <b>0.024</b>     | 1.166 (0.528-2.575)  | 0.704            |
| TNM stage (1-2 vs 3)            | 11.027 (4.426-27.469) | <b>&lt;0.001</b> | 6.225 (1.754-22.097) | <b>0.005</b> | 8.838 (4.406-17.73)       | <b>&lt;0.001</b> | 6.212 (2.531-15.245) | <b>&lt;0.001</b> |
| SSIGN (1-4 vs ≥5)               | 13.561 (5.225-35.197) | <b>&lt;0.001</b> | 3.294 (0.92-11.785)  | <b>0.027</b> | 16.547 (6.611-41.419)     | <b>&lt;0.001</b> | 3.864 (1.231-12.129) | <b>0.021</b>     |
| UBR5 expression (Low vs High)*  | 0.14 (0.055-0.36)     | <b>&lt;0.001</b> | 0.221 (0.071-0.686)  | <b>0.009</b> | 0.206 (0.105-0.404)       | <b>&lt;0.001</b> | 0.303 (0.138-0.668)  | <b>0.003</b>     |
| CD163 expression (Low vs High)* | 7.245 (2.109-24.897)  | <b>0.002</b>     | 3.322 (0.88-12.542)  | <b>0.037</b> | 3.595 (1.725-7.494)       | <b>0.001</b>     | 2.104 (0.959-4.613)  | <b>0.043</b>     |

\*: UBR5<sup>low</sup> expression: H-scores of UBR5<100; UBR5<sup>high</sup> expression: H-scores of UBR5≥100; CD163<sup>low</sup> expression: Density of CD163<15 cells/mm<sup>2</sup>; CD163<sup>high</sup> expression: Density of CD163≥15 cells/mm<sup>2</sup>.

**Table S13 Univariate and multivariate cox regression analysis of UBR5, CD163 and clinicopathologic characteristics with overall survival and progression-free survival in the validation cohort (n=155) (1:1 ratio)**

| Characteristics                 | Overall survival     |                  |                      |              | Progression free survival |                  |                      |                  |
|---------------------------------|----------------------|------------------|----------------------|--------------|---------------------------|------------------|----------------------|------------------|
|                                 | Univariate           |                  | Multivariate         |              | Univariate                |                  | Multivariate         |                  |
|                                 | HR (95% CI)          | P Value          | HR (95% CI)          | P Value      | HR (95% CI)               | P Value          | HR (95% CI)          | P Value          |
| Age (<60y vs ≥60y)              | 1.255 (0.467-3.372)  | 0.653            | 1.091 (0.383-3.109)  | 0.87         | 1.185 (0.598-2.346)       | 0.627            | 0.867 (0.414-1.814)  | 0.705            |
| Gender (Male vs Female)         | 0.364 (0.082-1.609)  | 0.182            | 0.969 (0.19-4.932)   | 0.97         | 0.423 (0.163-1.096)       | 0.077            | 0.598 (0.216-1.658)  | 0.323            |
| WHO/ISUP Grading (1-2 vs 3-4)   | 2.363 (0.857-6.513)  | <b>0.046</b>     | 2.393 (0.763-7.505)  | 0.135        | 2.519 (1.26-5.036)        | <b>0.009</b>     | 2.025 (0.973-4.216)  | 0.059            |
| TNM stage (1-2 vs 3)            | 5.596 (2.055-15.236) | <b>0.001</b>     | 2.905 (1.038-8.13)   | <b>0.042</b> | 4.128 (2.029-8.401)       | <b>&lt;0.001</b> | 1.976 (0.92-4.243)   | <b>0.031</b>     |
| SSIGN (1-4 vs ≥5)               | 9.983 (3.701-26.927) | <b>&lt;0.001</b> | 5.346 (1.739-16.434) | <b>0.003</b> | 16.046 (7.163-35.945)     | <b>&lt;0.001</b> | 13.498 (5.21-34.971) | <b>&lt;0.001</b> |
| UBR5 expression (Low vs High)*  | 0.135 (0.048-0.379)  | <b>&lt;0.001</b> | 0.22 (0.075-0.643)   | <b>0.006</b> | 0.251 (0.127-0.497)       | <b>&lt;0.001</b> | 0.405 (0.191-0.856)  | <b>0.018</b>     |
| CD163 expression (Low vs High)* | 7.466 (2.09-26.671)  | <b>0.002</b>     | 4.416 (1.191-16.378) | <b>0.026</b> | 4.875 (2.252-10.553)      | <b>&lt;0.001</b> | 4.287 (1.902-9.665)  | <b>&lt;0.001</b> |

\*: UBR5<sup>low</sup> expression: H-scores of UBR5<100; UBR5<sup>high</sup> expression: H-scores of UBR5≥100; CD163<sup>low</sup> expression: Density of CD163<15 cells/mm<sup>2</sup>; CD163<sup>high</sup> expression: Density of CD163≥15 cells/mm<sup>2</sup>.

**Table S14 Univariate cox regression analysis of UBR5, EZH2, CXCR4 and clinicopathologic characteristics with overall survival and progression-free survival in the combined cohort (n=310)**

| Characteristics                   | Univariate            |                  |                           |                  |
|-----------------------------------|-----------------------|------------------|---------------------------|------------------|
|                                   | Overall survival      |                  | Progression free survival |                  |
|                                   | HR (95% CI)           | P Value          | HR (95% CI)               | P Value          |
| Age (<60y vs ≥60y)                | 1.326 (0.682-2.577)   | 0.405            | 1.143 (0.708-1.842)       | 0.585            |
| Gender (Male vs Female)           | 0.902 (0.422-1.923)   | 0.789            | 0.772 (0.375-1.350)       | 0.363            |
| WHO/ISUP Grading (1-2 vs 3-4)     | 2.786 (1.412-5.495)   | <b>0.003</b>     | 2.381 (1.456-3.906)       | <b>0.001</b>     |
| TNM stage (1-2 vs 3)              | 7.634 (3.891-14.925)  | <b>0.003</b>     | 5.747 (3.497-9.434)       | <b>&lt;0.001</b> |
| SSIGN (1-4 vs ≥5)                 | 11.628 (5.882-22.727) | <b>&lt;0.001</b> | 15.152 (8.403-27.027)     | <b>&lt;0.001</b> |
| UBR5 expression (Low vs High)*    | 0.114 (0.047-0.277)   | <b>&lt;0.001</b> | 0.146 (0.082-0.260)       | <b>&lt;0.001</b> |
| EZH2 expression (Low vs High)**   | 3.175 (1.318-7.634)   | <b>0.010</b>     | 2.398 (1.353-4.255)       | <b>0.003</b>     |
| CXCR4 expression (Low vs High)*** | 7.299 (2.558-20.833)  | <b>&lt;0.001</b> | 6.410 (3.175-12.987)      | <b>&lt;0.001</b> |

\*: UBR5<sup>low</sup> expression: H-scores of UBR5<130; UBR5<sup>high</sup> expression: H-scores of UBR5≥130.

\*\* : EZH2<sup>low</sup> expression: H-scores of EZH2<160; EZH2<sup>high</sup> expression: H-scores of EZH2≥160.

\*\*\*: CXCR4<sup>low</sup> expression: H-scores of CXCR4<160; CXCR4<sup>high</sup> expression: H-scores of CXCR4≥160.

**Table S15 Multivariate cox regression analysis of UBR5 and clinicopathologic characteristics with overall survival and progression-free survival in the combined cohort (n=310)**

| Characteristics                | Overall survival     |                  | Progression free survival |                  |
|--------------------------------|----------------------|------------------|---------------------------|------------------|
|                                | Multivariate         |                  | Multivariate              |                  |
|                                | HR (95% CI)          | P Value          | HR (95% CI)               | P Value          |
| Age (<60y vs ≥60y)             | 1.076 (0.542-2.138)  | 0.834            | 1.028 (0.629-1.678)       | 0.913            |
| Gender (Male vs Female)        | 1.118 (0.513-2.435)  | 0.780            | 0.823 (0.469-1.445)       | 0.497            |
| WHO/ISUP Grading (1-2 vs 3-4)  | 1.960 (0.960-4.002)  | 0.065            | 1.397 (0.826-2.358)       | 0.212            |
| TNM stage (1-2 vs 3)           | 2.955 (1.416-6.170)  | <b>0.004</b>     | 2.457 (1.404-4.292)       | <b>0.002</b>     |
| SSIGN (1-4 vs ≥5)              | 6.550 (3.113-13.785) | <b>&lt;0.001</b> | 8.475 (4.386-16.393)      | <b>&lt;0.001</b> |
| UBR5 expression (Low vs High)* | 0.189 (0.076-0.471)  | <b>&lt;0.001</b> | 0.215 (0.117-0.394)       | <b>&lt;0.001</b> |

\*: UBR5<sup>low</sup> expression: H-scores of UBR5<130; UBR5<sup>high</sup> expression: H-scores of UBR5≥130.

**Table S16 C-index analysis of the prognostic accuracy of UBR5, CD163 and other variables for overall survival and progression-free survival in the training and validation cohorts (1:1 ratio)**

| <b>C-index (95% CI)</b>     | <b>Overall survival</b>        |                                  | <b>Progression-free survival</b> |                                  |
|-----------------------------|--------------------------------|----------------------------------|----------------------------------|----------------------------------|
|                             | <b>Training cohort (n=155)</b> | <b>Validation cohort (n=155)</b> | <b>Training cohort (n=155)</b>   | <b>Validation cohort (n=155)</b> |
| <b>TNM stage</b>            | 0.72 (0.686~0.754)             | 0.623 (0.574~0.671)              | 0.672 (0.648~0.695)              | 0.608 (0.576~0.641)              |
| <b>SSIGN</b>                | 0.655 (0.628~0.681)            | 0.711 (0.675~0.746)              | 0.631 (0.614~0.647)              | 0.691 (0.67~0.711)               |
| <b>UBR5</b>                 | 0.742 (0.692~0.792)            | 0.751 (0.693~0.81)               | 0.688 (0.652~0.725)              | 0.664 (0.625~0.704)              |
| <b>CD163</b>                | 0.696 (0.636~0.755)            | 0.689 (0.62~0.758)               | 0.658 (0.614~0.702)              | 0.668 (0.622~0.715)              |
| <b>UBR5+CD163</b>           | 0.788 (0.724~0.852)            | 0.794 (0.719~0.869)              | 0.755 (0.708~0.803)              | 0.732 (0.681~0.783)              |
| <b>UBR5+CD163+TNM stage</b> | 0.842 (0.777~0.907)            | 0.812 (0.736~0.889)              | 0.806 (0.758~0.854)              | 0.757 (0.706~0.809)              |
| <b>UBR5+CD163+SSIGN</b>     | 0.847 (0.783~0.911)            | 0.863 (0.787~0.939)              | 0.799 (0.751~0.846)              | 0.805 (0.754~0.856)              |



**Table S17 C-index analysis of the prognostic accuracy of UBR5, CD163, EZH2, CXCR4 and other variables for overall survival and progression-free survival in the combined cohort (n=310)**

|                             | <b>C-index (95% CI)</b> |                                  |
|-----------------------------|-------------------------|----------------------------------|
|                             | <b>Overall survival</b> | <b>Progression-free survival</b> |
| <b>TNM stage</b>            | 0.679 (0.65~0.707)      | 0.642 (0.623~0.662)              |
| <b>SSIGN</b>                | 0.677 (0.656~0.699)     | 0.657 (0.644~0.67)               |
| <b>CD163</b>                | 0.691 (0.646~0.736)     | 0.663 (0.631~0.695)              |
| <b>UBR5</b>                 | 0.677 (0.656~0.699)     | 0.676 (0.649~0.702)              |
| <b>EZH2</b>                 | 0.519 (0.475~0.563)     | 0.502 (0.47~0.533)               |
| <b>CXCR4</b>                | 0.678 (0.633~0.723)     | 0.665 (0.633~0.697)              |
| <b>UBR5+CD163</b>           | 0.81 (0.762~0.859)      | 0.739 (0.705~0.774)              |
| <b>UBR5+CD163+TNM stage</b> | 0.821 (0.772~0.87)      | 0.774 (0.739~0.809)              |
| <b>UBR5+CD163+SSIGN</b>     | 0.854 (0.805~0.903)     | 0.791 (0.756~0.826)              |

**Table S18 Multivariate cox regression analysis of EZH2 and clinicopathologic characteristics with overall survival and progression-free survival in the combined cohort (n=310)**

| Characteristics                | Overall survival     |                  | Progression free survival |                  |
|--------------------------------|----------------------|------------------|---------------------------|------------------|
|                                | Multivariate         |                  | Multivariate              |                  |
|                                | HR (95% CI)          | P Value          | HR (95% CI)               | P Value          |
| Age (<60y vs ≥60y)             | 1.247 (0.616-2.525)  | 0.540            | 1.147 (0.704-1.869)       | 0.582            |
| Gender (Male vs Female)        | 0.988 (0.456-2.141)  | 0.976            | 0.708 (0.402-1.247)       | 0.232            |
| WHO/ISUP Grading (1-2 vs 3-4)  | 1.961 (0.945-4.082)  | 0.071            | 1.745 (1.029-2.959)       | <b>0.039</b>     |
| TNM stage (1-2 vs 3)           | 4.219 (2.053-8.696)  | <b>&lt;0.001</b> | 3.205 (1.828-5.618)       | <b>&lt;0.001</b> |
| SSIGN (1-4 vs ≥5)              | 6.897 (3.333-14.286) | <b>&lt;0.001</b> | 9.524 (4.975-18.182)      | <b>&lt;0.001</b> |
| EZH2 expression (Low vs High)* | 2.793 (1.131-6.897)  | <b>0.026</b>     | 2.004 (1.117-3.597)       | <b>0.020</b>     |

\*: EZH2<sup>low</sup> expression: H-scores of EZH2<160; EZH2<sup>high</sup> expression: H-scores of EZH2≥160.

**Table S19 Multivariate cox regression analysis of CXCR4 and clinicopathologic characteristics with overall survival and progression-free survival in the combined cohort (n=310)**

| Characteristics                 | Overall survival     |                  | Progression free survival |                  |
|---------------------------------|----------------------|------------------|---------------------------|------------------|
|                                 | Multivariate         |                  | Multivariate              |                  |
|                                 | HR (95% CI)          | P Value          | HR (95% CI)               | P Value          |
| Age (<60y vs ≥60y)              | 1.036 (0.522-2.058)  | 0.918            | 1.059 (0.652-1.718)       | 0.817            |
| Gender (Male vs Female)         | 1.473 (0.664-3.268)  | 0.341            | 1.071 (0.603-1.901)       | 0.816            |
| WHO/ISUP Grading (1-2 vs 3-4)   | 2.028 (1.015-4.049)  | <b>0.045</b>     | 1.667 (0.999-2.778)       | <b>0.050</b>     |
| TNM stage (1-2 vs 3)            | 3.953 (1.972-7.937)  | <b>&lt;0.001</b> | 2.725 (1.587-2.778)       | <b>&lt;0.001</b> |
| SSIGN (1-4 vs ≥5)               | 7.519 (3.610-15.625) | <b>&lt;0.001</b> | 11.494 (5.952-22.222)     | <b>&lt;0.001</b> |
| CXCR4 expression (Low vs High)* | 5.435 (1.880-15.625) | <b>0.002</b>     | 5.319 (2.584-10.989)      | <b>&lt;0.001</b> |

**\*: CXCR4<sup>low</sup> expression: H-scores of CXCR4<160; CXCR4<sup>high</sup> expression: H-scores of CXCR4≥160.**
