# Supplementary material
Source: PubMed Central journal article supplement (PMC10992313)

# Supplementary Figure S1

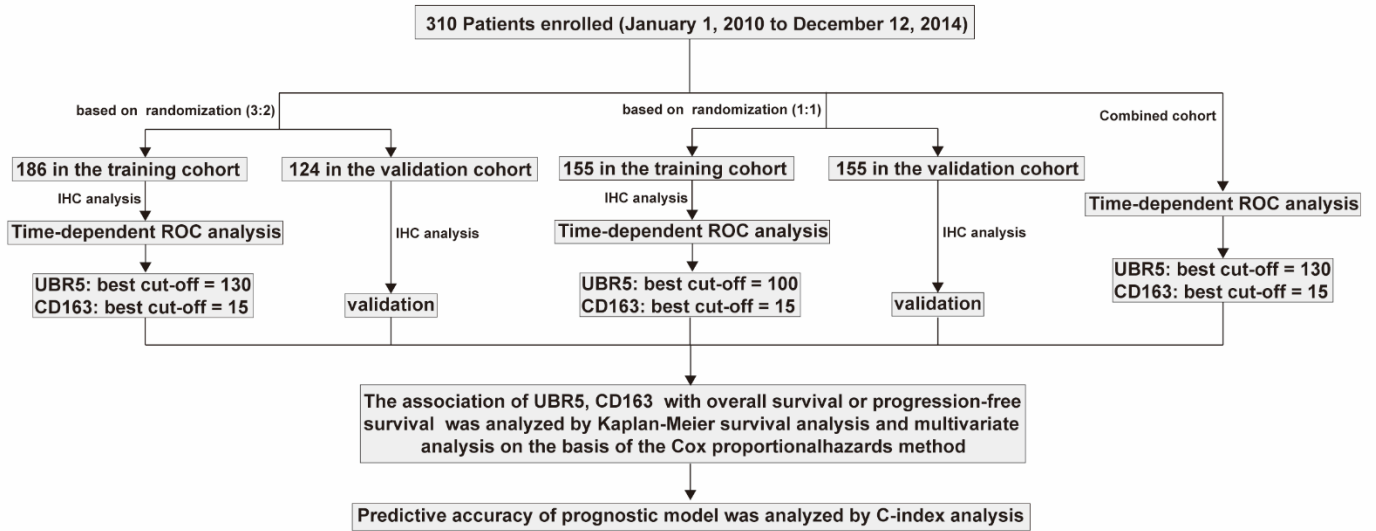

Supplementary Fig. S1 A flow chart of our research design.

Supplement: 262_2021_2885_MOESM1_ESM.pdf [file 262_2021_2885_MOESM1_ESM.pdf]
